# Supplementary material for: Energy landscape for the insertion of amphiphilic nanoparticles into lipid membranes: A computational study
Source: PubMed Central journal article supplement (PMC6326551; doi:10.1371/journal.pone.0209492), 2019-01-09
Supplement: pone.0209492.s006.pdf [file pone.0209492.s006.pdf]

**S1 Table** Threshold distances used for calculating the number of sulfonate-choline contacts and the coordination number.

|                                 |       |                 |         |
|---------------------------------|-------|-----------------|---------|
| <b>Polar group:</b>             | Water | Na <sup>+</sup> | Choline |
| <b>Central atom:</b>            | O     | Na              | N       |
| <b>Threshold distance (nm):</b> | 0.46  | 0.42            | 0.70    |
